# Supplementary material
Source: PubMed Central journal article supplement (PMC3757556)
Supplement: NIHMS470495-supplement-1_si_001.pdf [file NIHMS470495-supplement-1_si_001.pdf]

Supplemental data

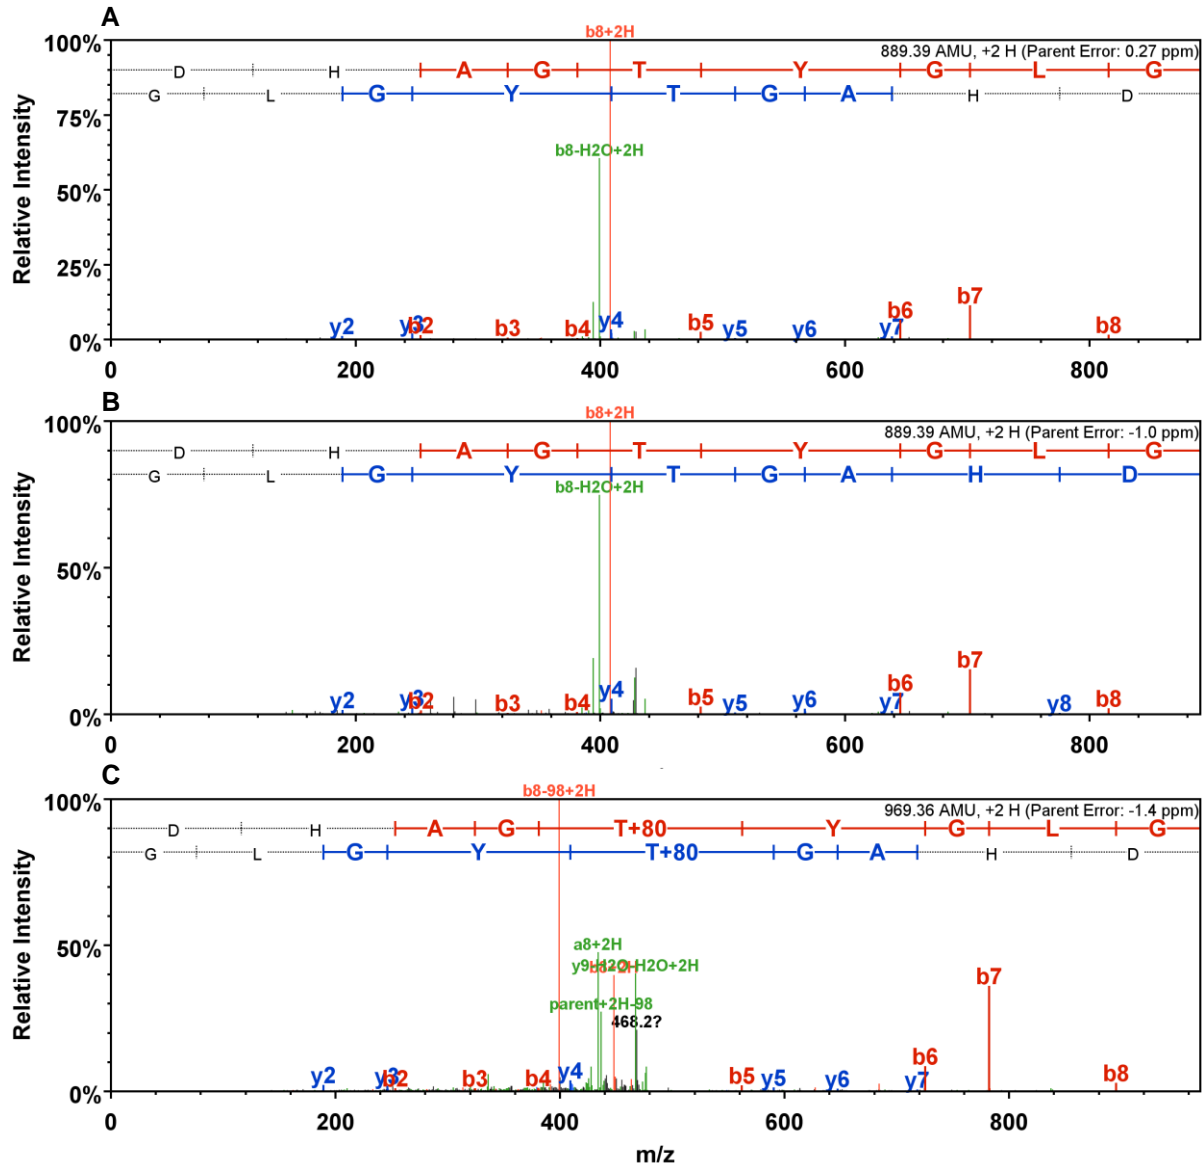

Figure S1. MS/MS spectra of (A) control, (B) Chk1-treated and (C) Chk2-treated samples showing that Thr17 was phosphorylated by Chk2 only. The corresponding nonphosphopeptide detected in the control and Chk1-treated sample are also shown. The unannotated peak at  $m/z$  468.2 in (C) corresponds to parent-H<sub>2</sub>O-NH<sub>3</sub>+2H.

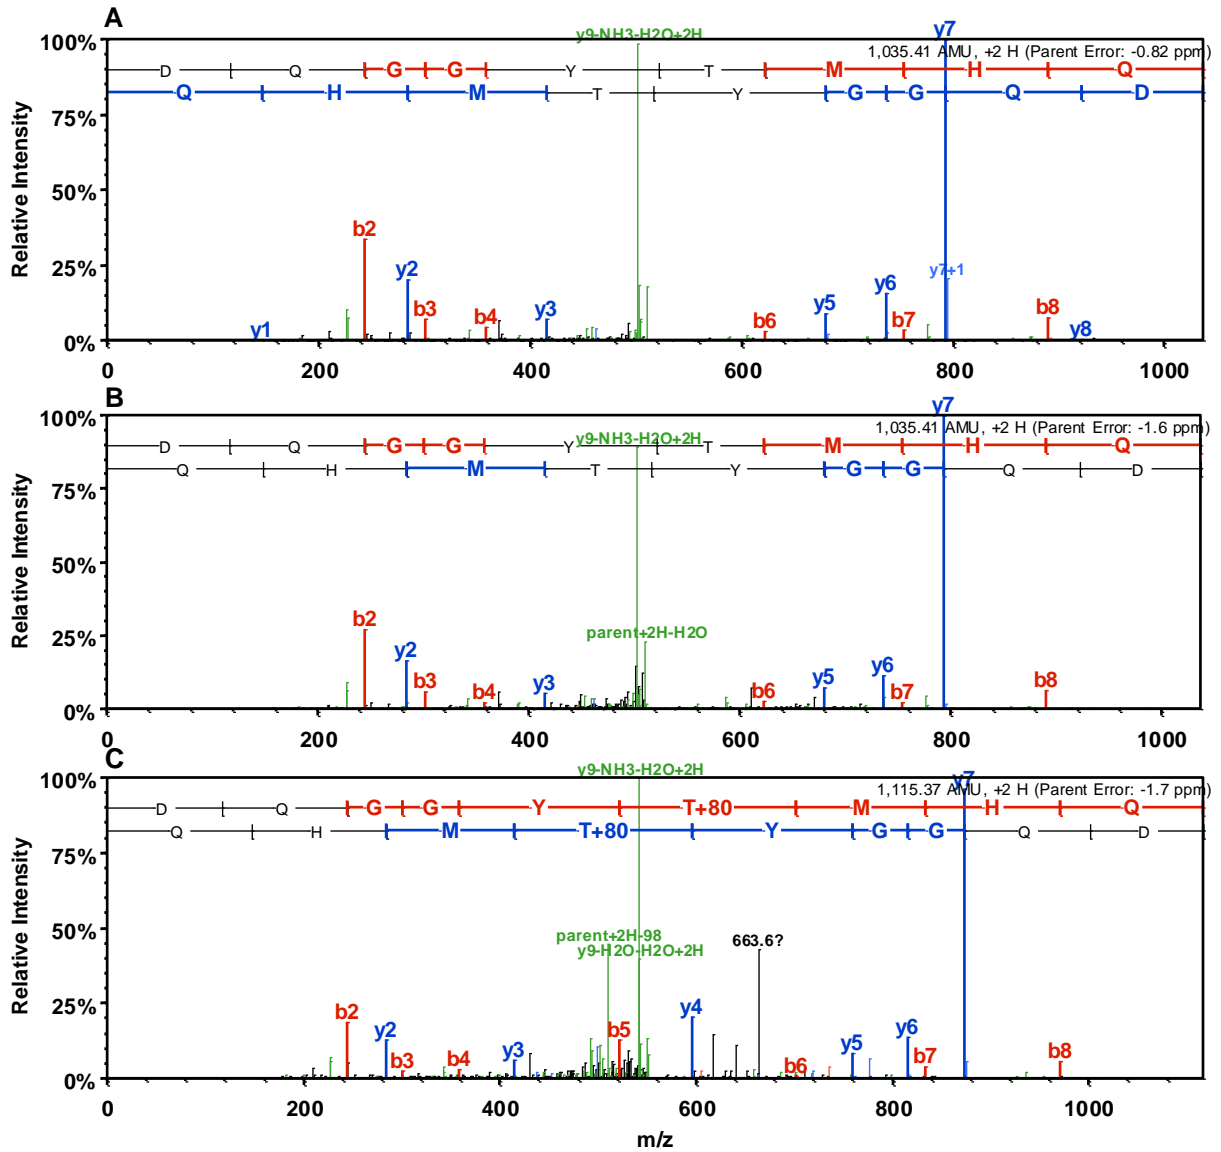

Figure S2. MS/MS spectra of (A) control, (B) Chk1-treated and (C) Chk2-treated samples showing that Thr30 was phosphorylated by Chk2 only. The corresponding nonphosphopeptide detected in the control and Chk1-treated sample are also shown. The unannotated peak at  $m/z$  663.6 in (C) was identified not to be a part of the peptide of interest.

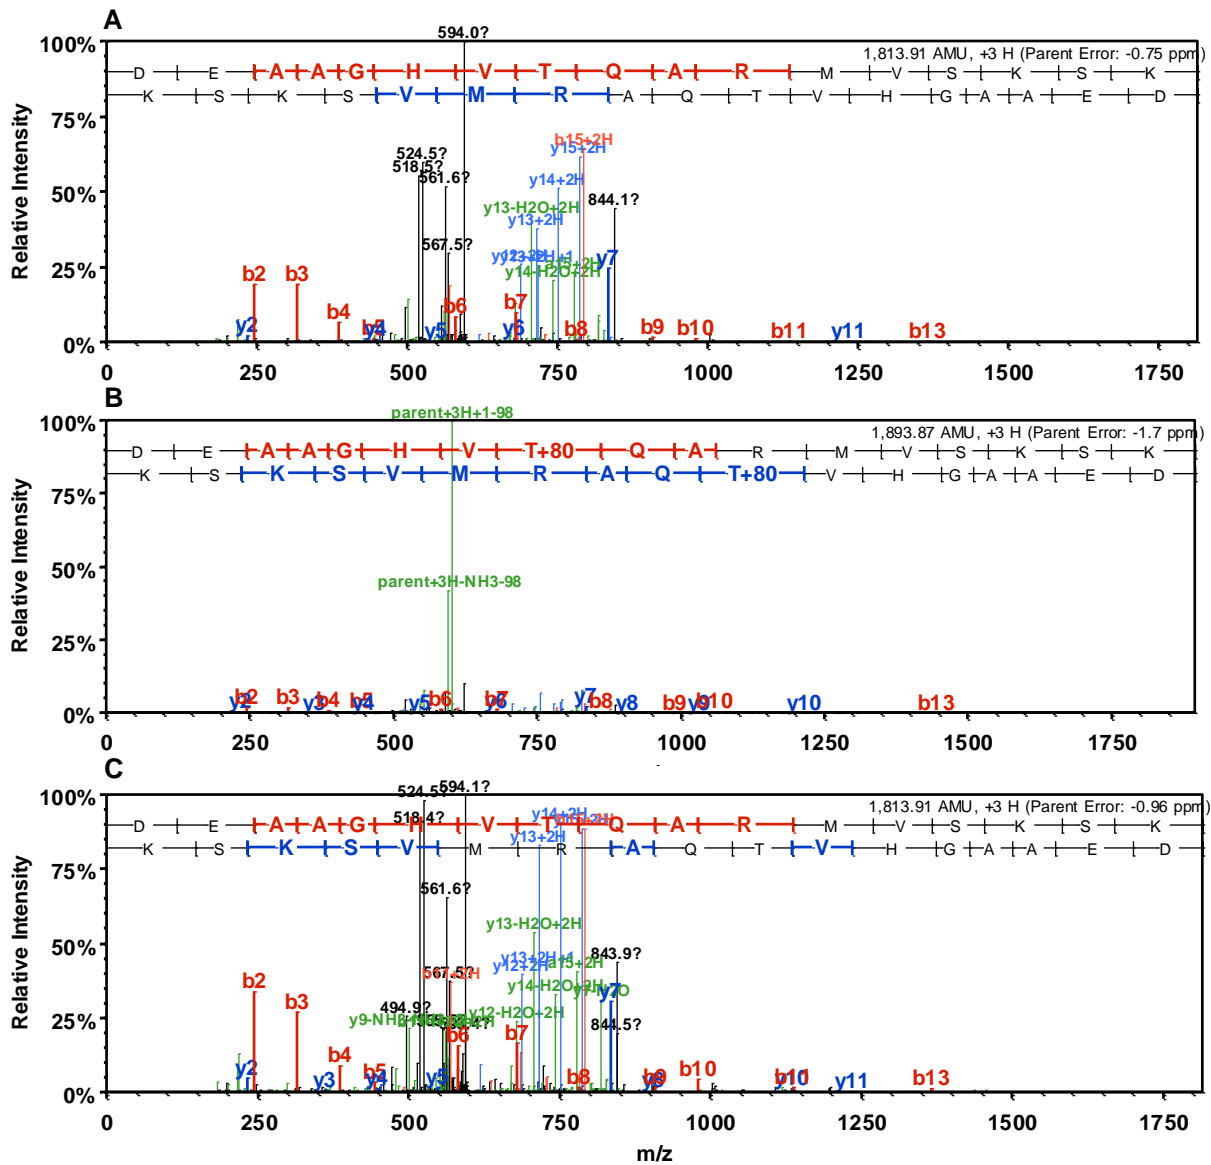

Figure S3. MS/MS spectra of (A) control, (B) Chk1-treated and (C) Chk2-treated samples showing that Thr123 was phosphorylated by Chk1 only. The corresponding nonphosphopeptide detected in the control and Chk2-treated sample are also shown. The unannotated peaks in the spectra are identified as follows: (A)  $m/z$  518.5:  $a_{15}+3H$ ;  $m/z$  524.5:  $y_{15}+3H$ ;  $m/z$  561.6:  $y_{16}-NH_3+3H$ ;  $m/z$  567.5:  $y_{16}+3H$ ;  $m/z$  594.0:  $M-NH_3-H_2O+3H$ ;  $m/z$  844.1:  $b_{16}+H_2O+2H$  (C)  $m/z$  494.9:  $y_{14}-NH_3+3H$ ;  $m/z$  518.4:  $a_{15}+3H$ ;  $m/z$  524.5:  $y_{15}+3H$ ;  $m/z$  561.6:  $y_{16}-NH_3+3H$ ;  $m/z$  567.5:  $y_{16}+3H$ ;  $m/z$  594.1:  $M-NH_3-H_2O+3H$ ;  $m/z$  843.9:  $b_{16}+H_2O+2H$ ;  $m/z$  844.5:  $b_{16}+H_2O+2H$

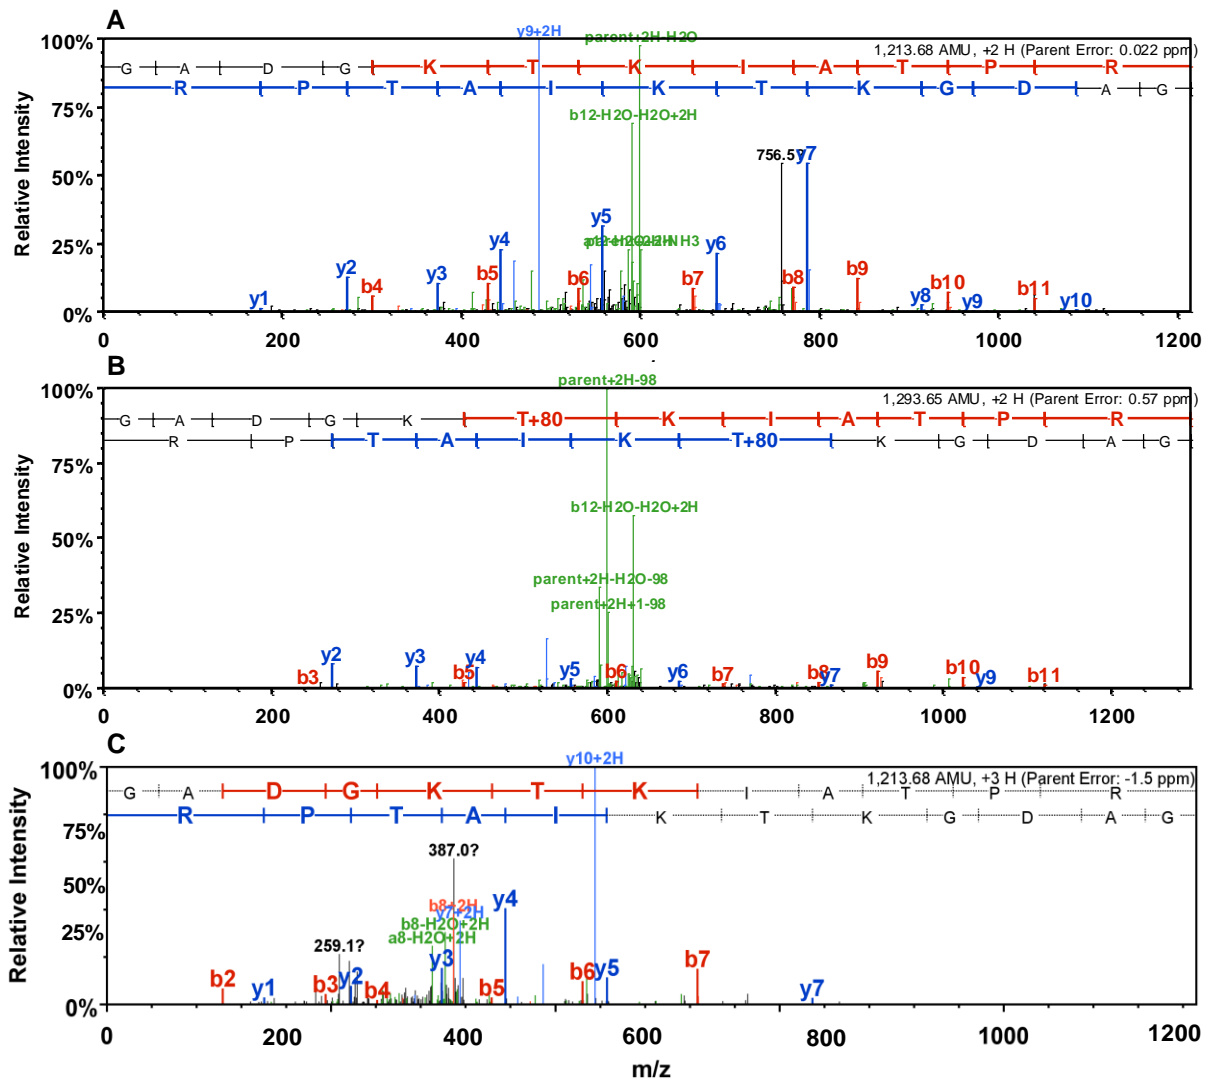

Figure S4. MS/MS spectra of (A) control, (B) Chk1-treated and (C) Chk2-treated samples showing that Thr149 was phosphorylated by Chk1 only. The corresponding nonphosphopeptide detected in the control and Chk2-treated sample are also shown. The peptide detected in the Chk2-treated sample has a different charge state. The unannotated peaks at  $m/z$  259.1 and 387.0 in (C) correspond to  $a_6\text{-NH}_3+2\text{O}+2\text{H}$  and  $y_3+\text{O}-2\text{H}$ , respectively. The unannotated peak at  $m/z$  756.5 in (A) was identified not to be a part of the peptide of interest.

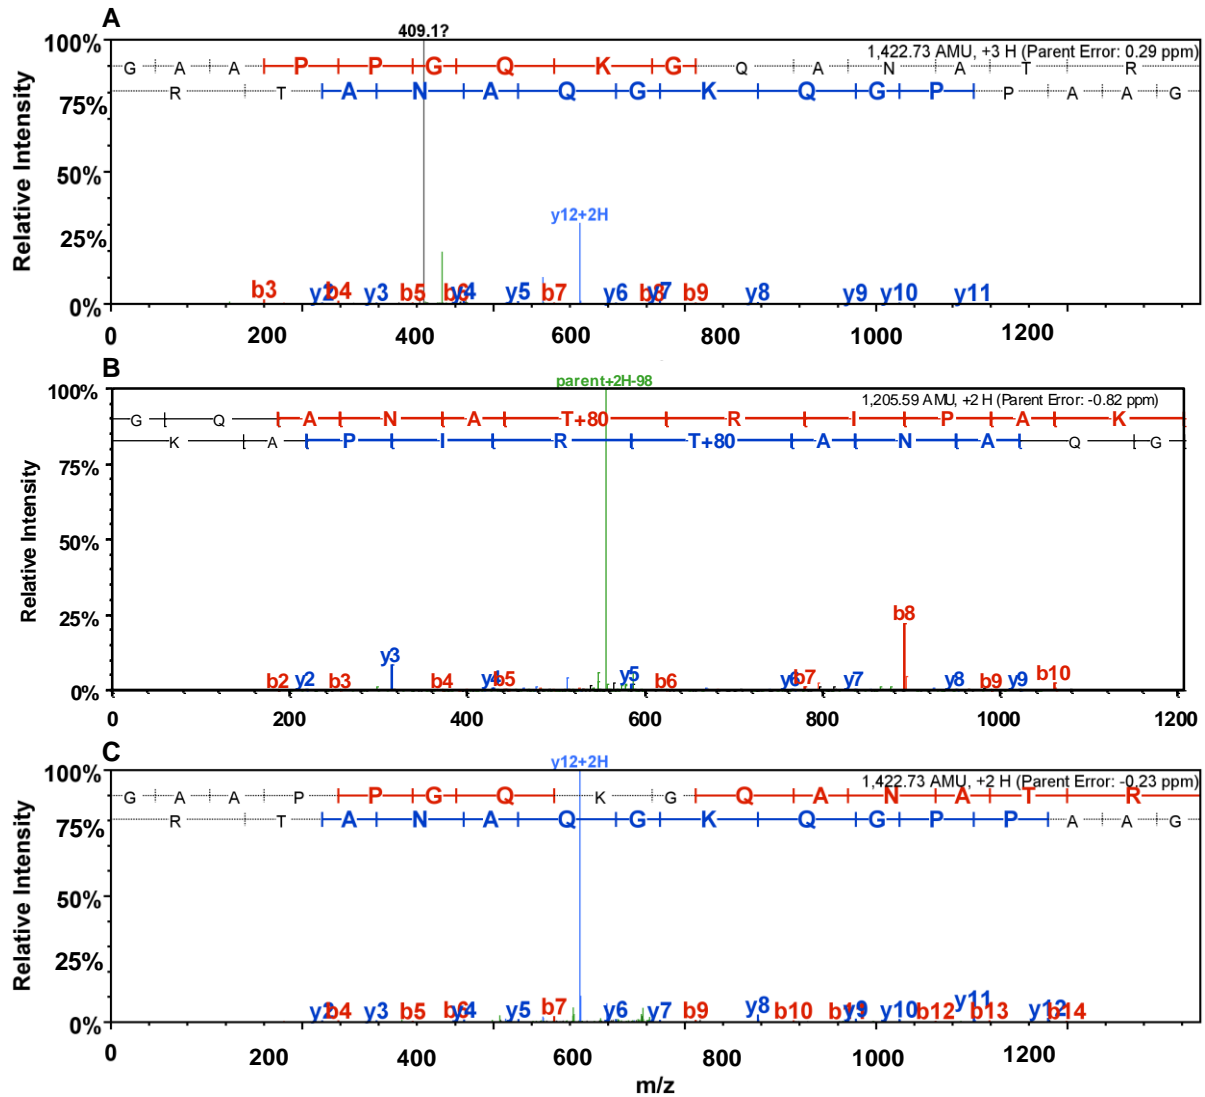

Figure S5. MS/MS spectra of (A) control, (B) Chk1-treated and (C) Chk2-treated samples showing that Thr169 was phosphorylated by Chk1 only. The exact corresponding nonphosphopeptide was not detected in either the control or Chk2-treated sample. A different nonphosphopeptide containing the residue of interest was detected instead, for both the control and Chk2-treated sample. The unannotated peak at  $m/z$  409.1 in (A) corresponds to  $y_{12}+3H$ .

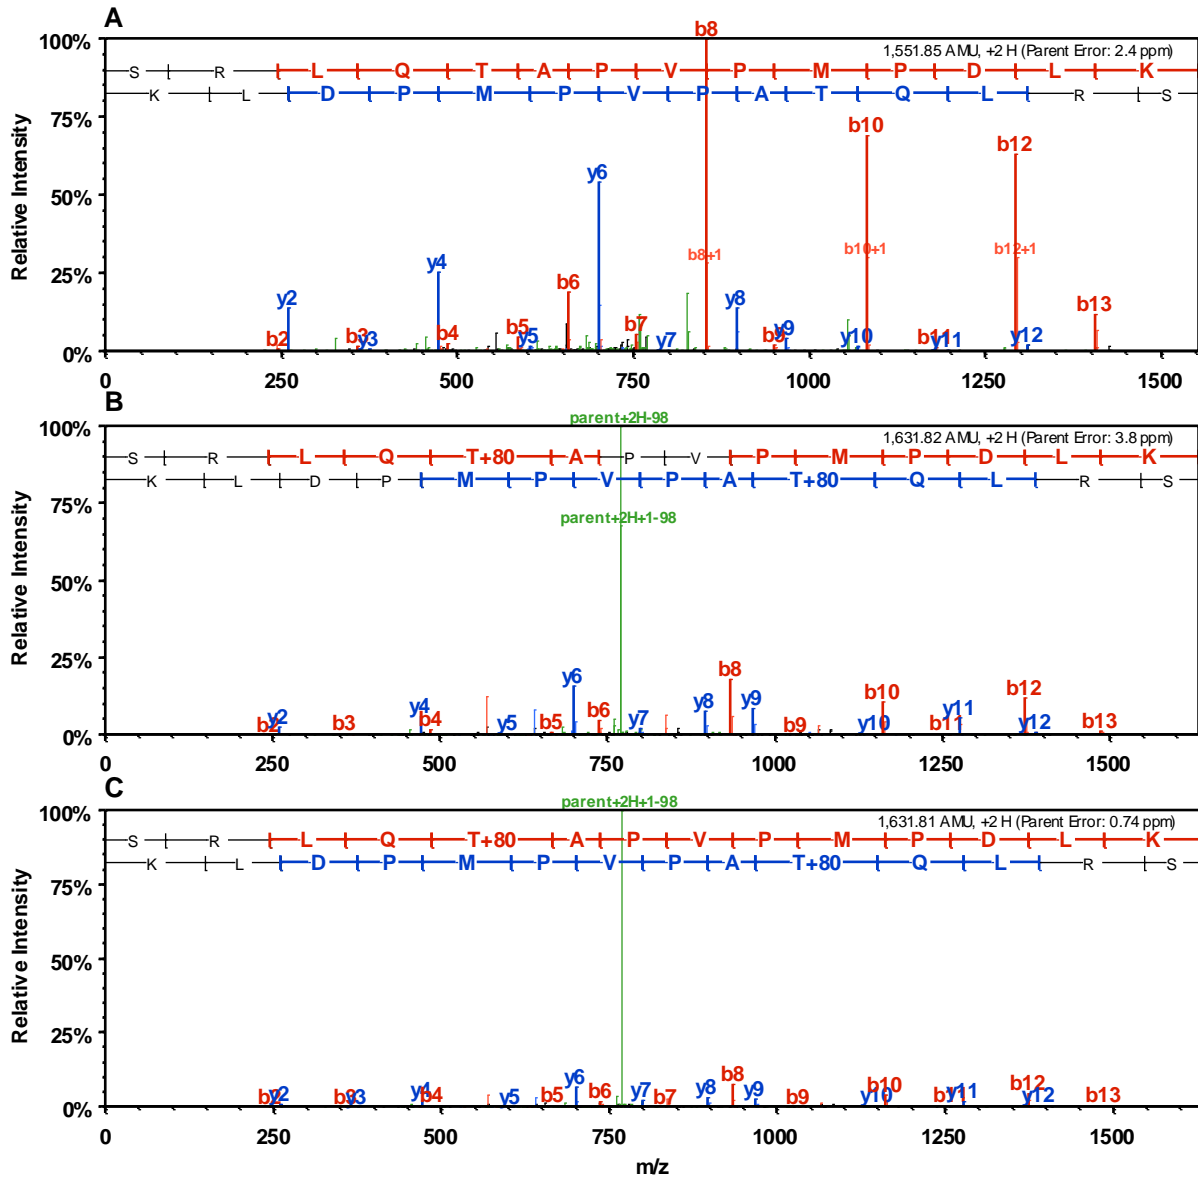

Figure S6. MS/MS spectra of (A) control, (B) Chk1-treated and (C) Chk2-treated samples showing that Thr245 was phosphorylated by Chk1 and Chk2. The corresponding nonphosphopeptide detected in the control is also shown.

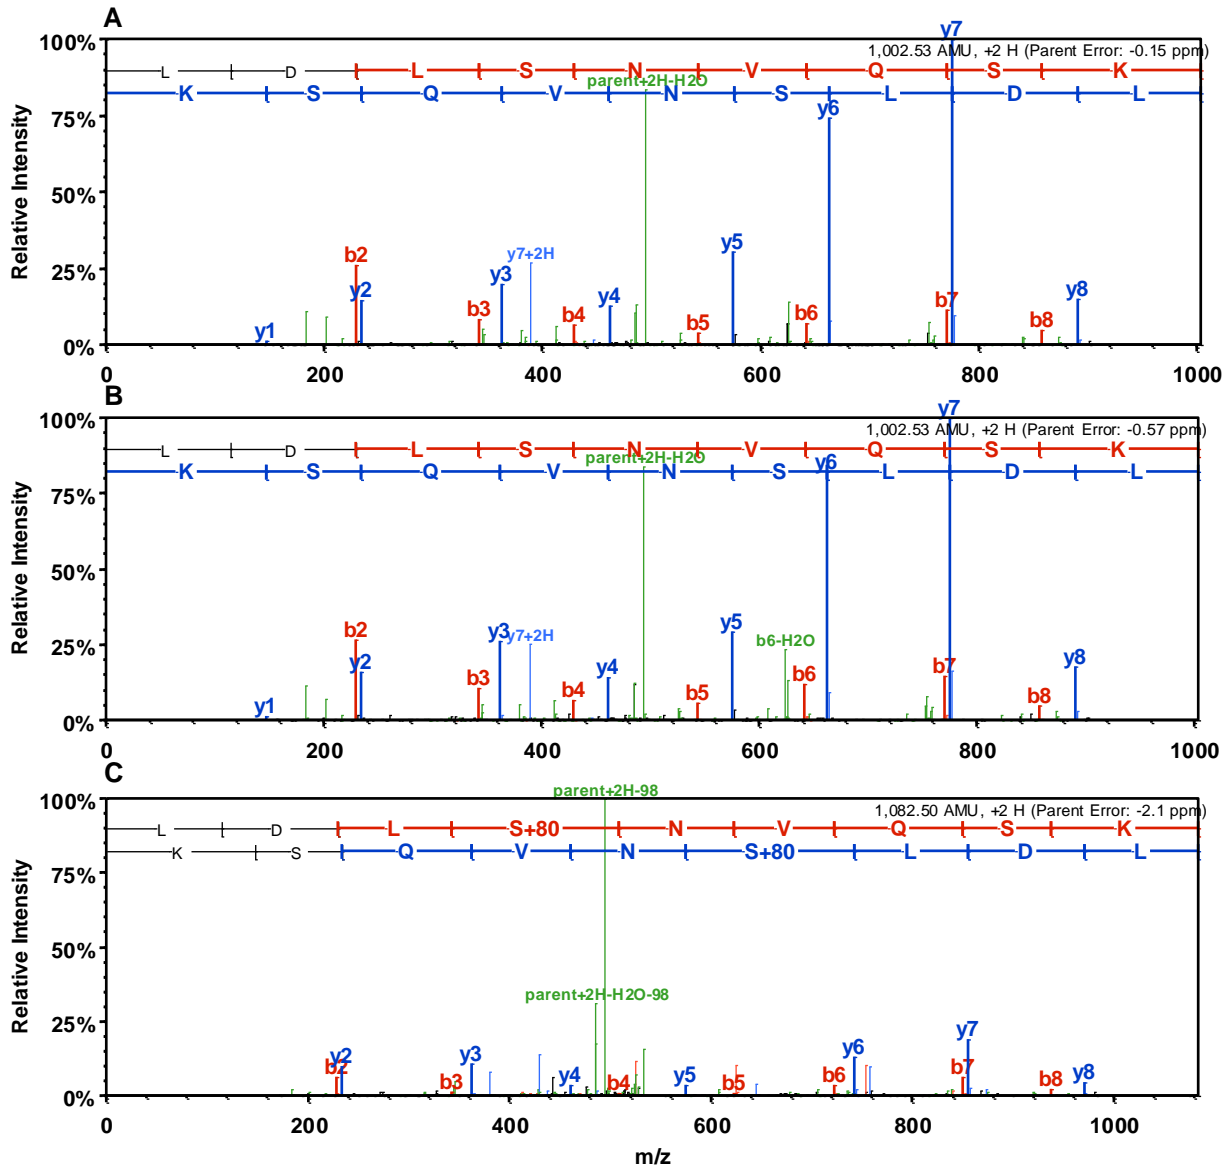

Figure S7. MS/MS spectra (A) control, (B) Chk1-treated and (C) Chk2-treated samples showing that Ser285 was phosphorylated by Chk2 only. The corresponding nonphosphopeptide detected in the control and Chk1-treated sample are also shown.

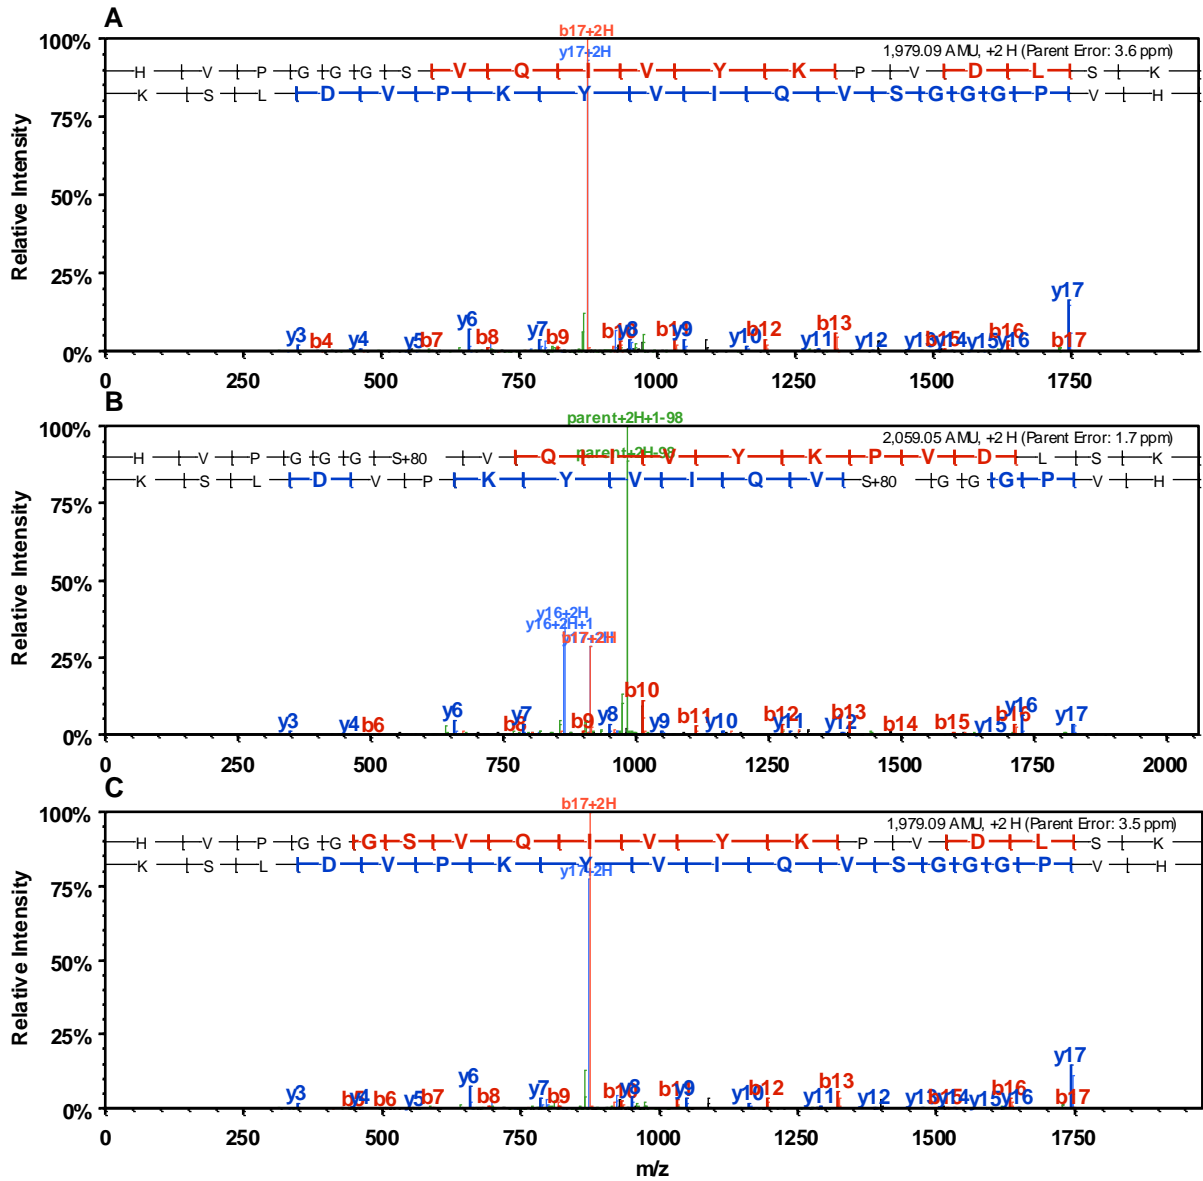

Figure S8. MS/MS spectra of (A) control, (B) Chk1-treated and (C) Chk2-treated samples showing that Ser305 was phosphorylated by Chk1 only. The corresponding nonphosphopeptide detected in the control and Chk2-treated sample are also shown.



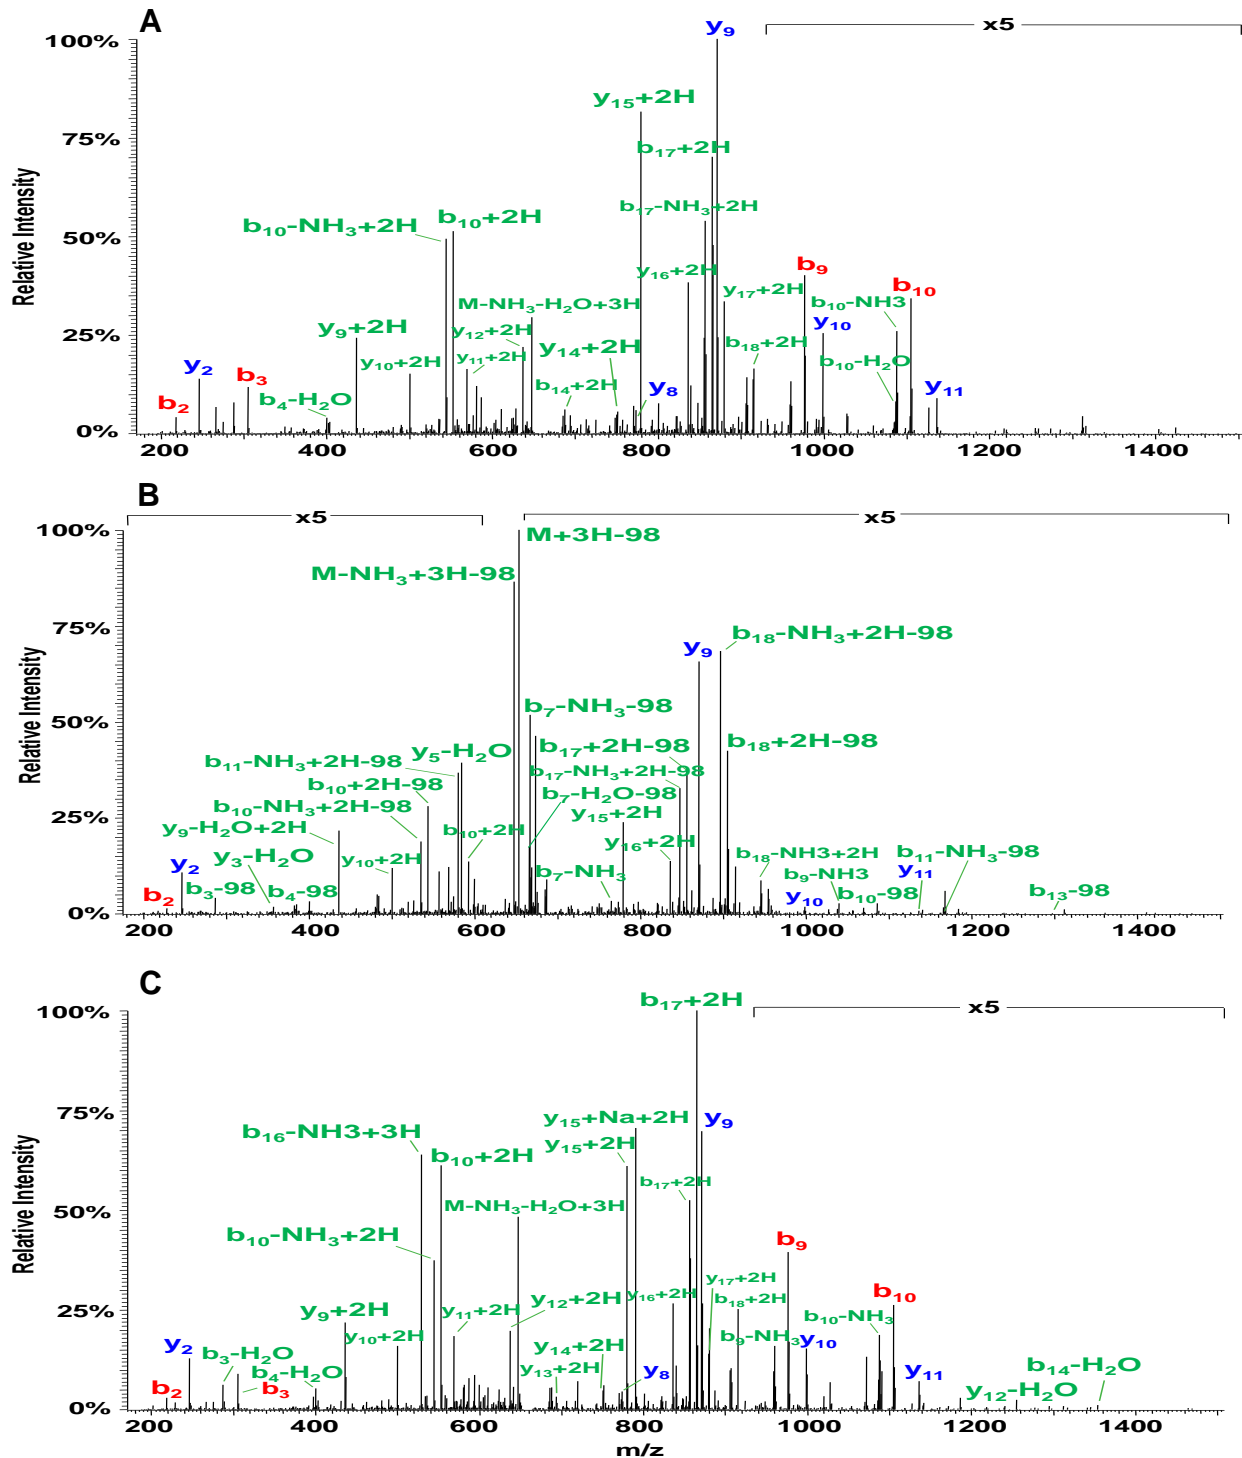

Figure S9. MS/MS spectra of (A) control, (B) Chk1-treated and (C) Chk2-treated samples showing that Ser324 (cGS<sub>324</sub>LGNIHHKPGGGQVEVK) was phosphorylated by Chk1 only. The corresponding nonphosphopeptide detected in the control and Chk2-treated sample are also shown. Phosphorylation, in this case, was established after manual inspection of MS/MS and MS<sup>3</sup> scans.

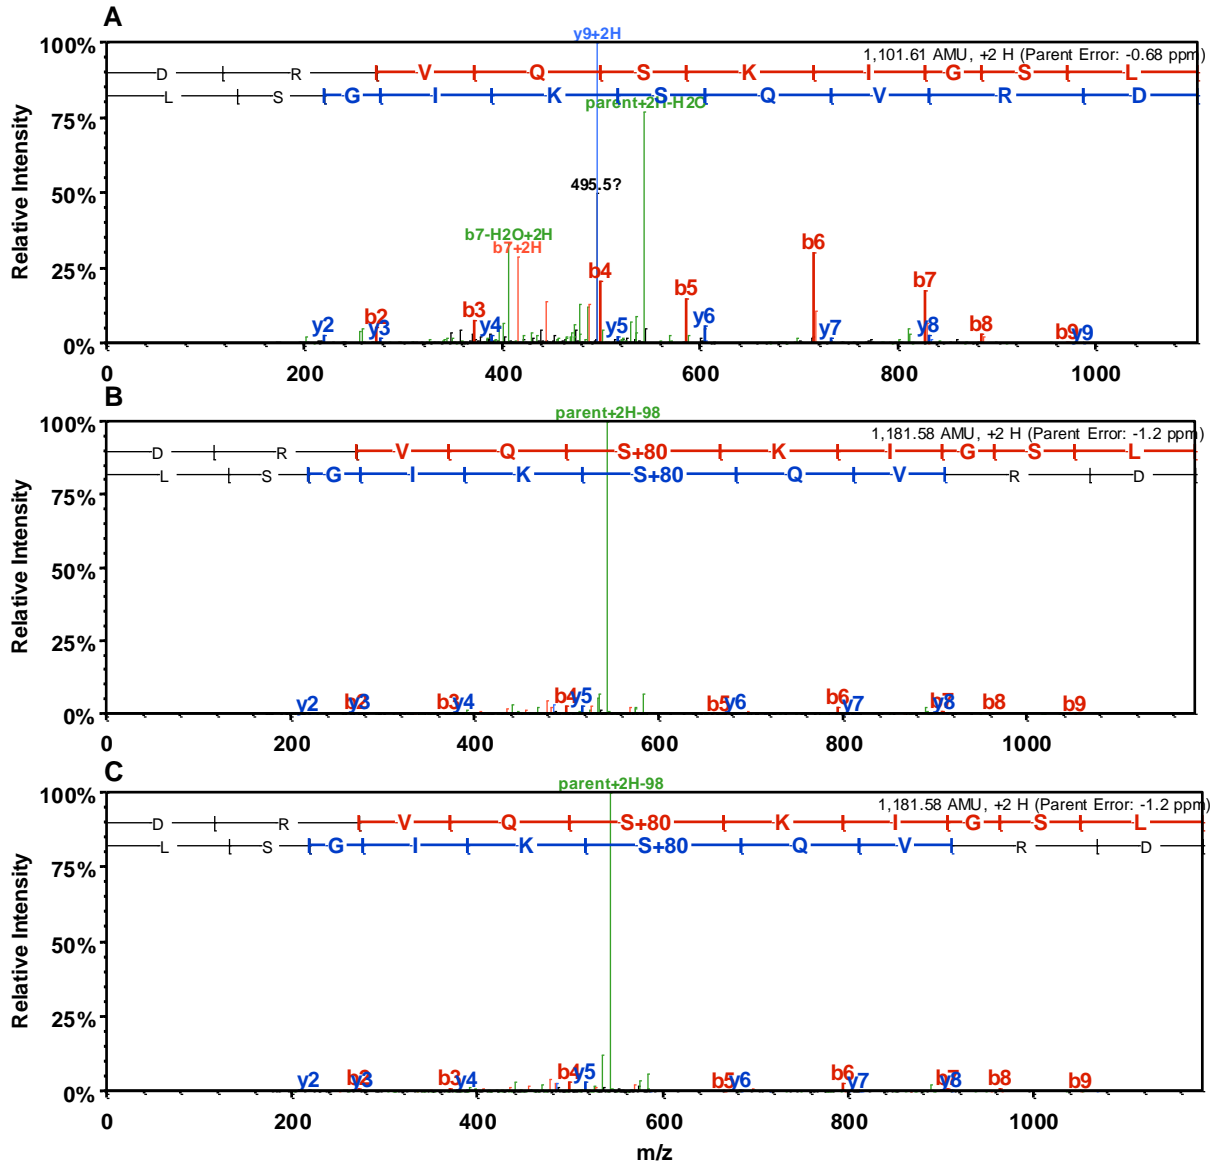

Figure S10. MS/MS spectra of (A) control, (B) Chk1-treated and (C) Chk2-treated samples showing that Ser352 was phosphorylated by Chk1 and Chk2. The corresponding nonphosphopeptide detected in the control is also shown. The unannotated peak at  $m/z$  495.5 in (A) corresponds to  $b_9+H_2O+2H$ .

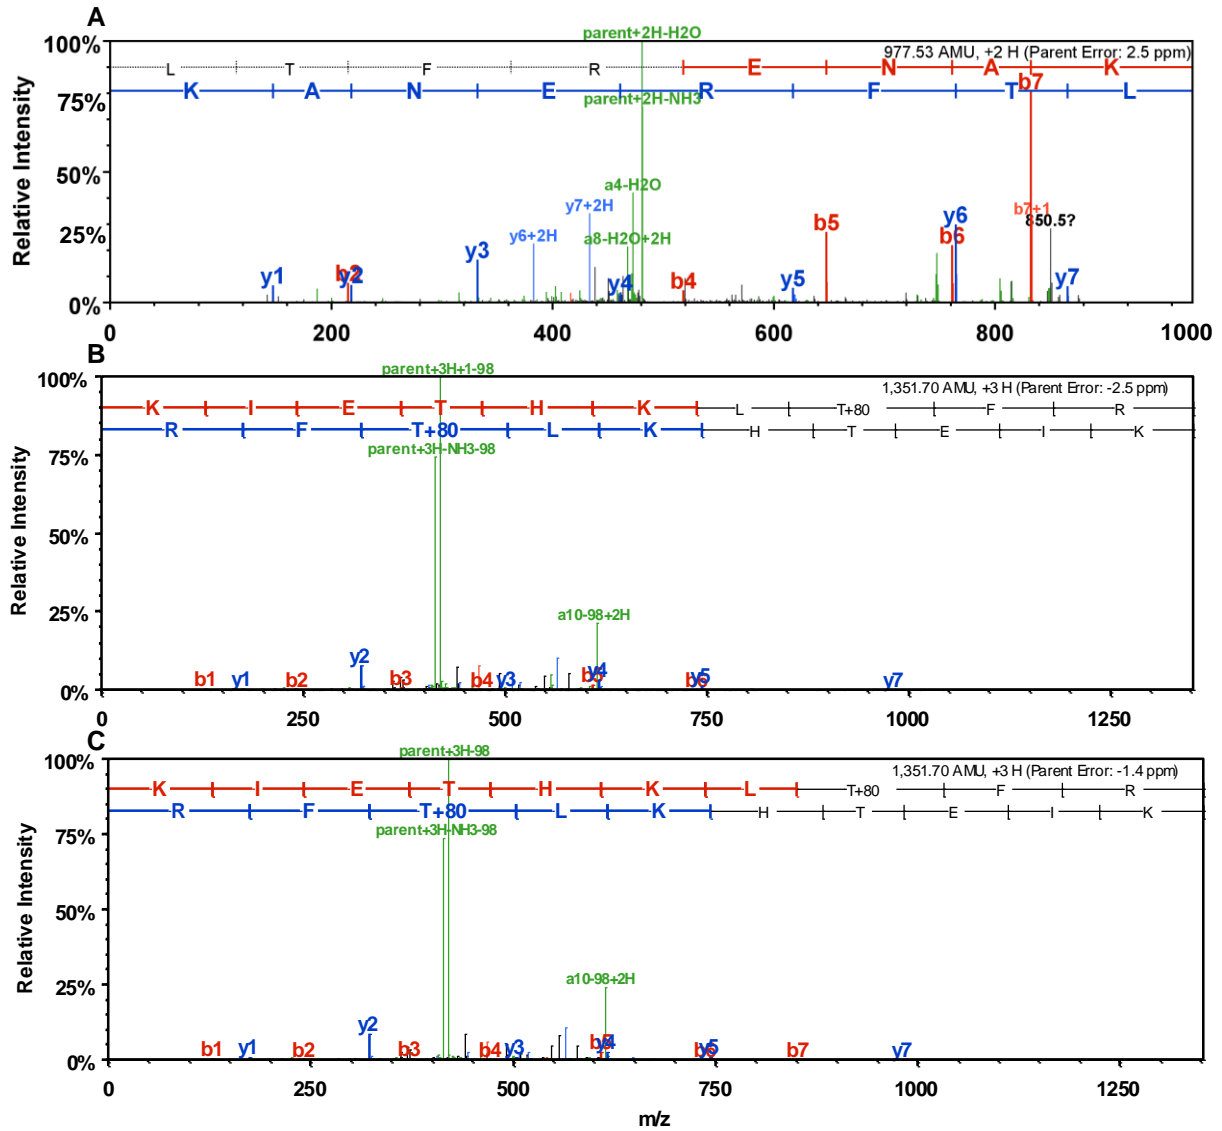

Figure S11. MS/MS spectra of (A) control, (B) Chk1-treated and (C) Chk2-treated samples showing that Thr377 was phosphorylated by Chk1 and Chk2. The exact corresponding nonphosphopeptide was not detected in the control. A different nonphosphopeptide containing the residue of interest was detected instead. The unannotated peak at  $m/z$  850.5 in (A) corresponds to  $b_7+H_2O$ .

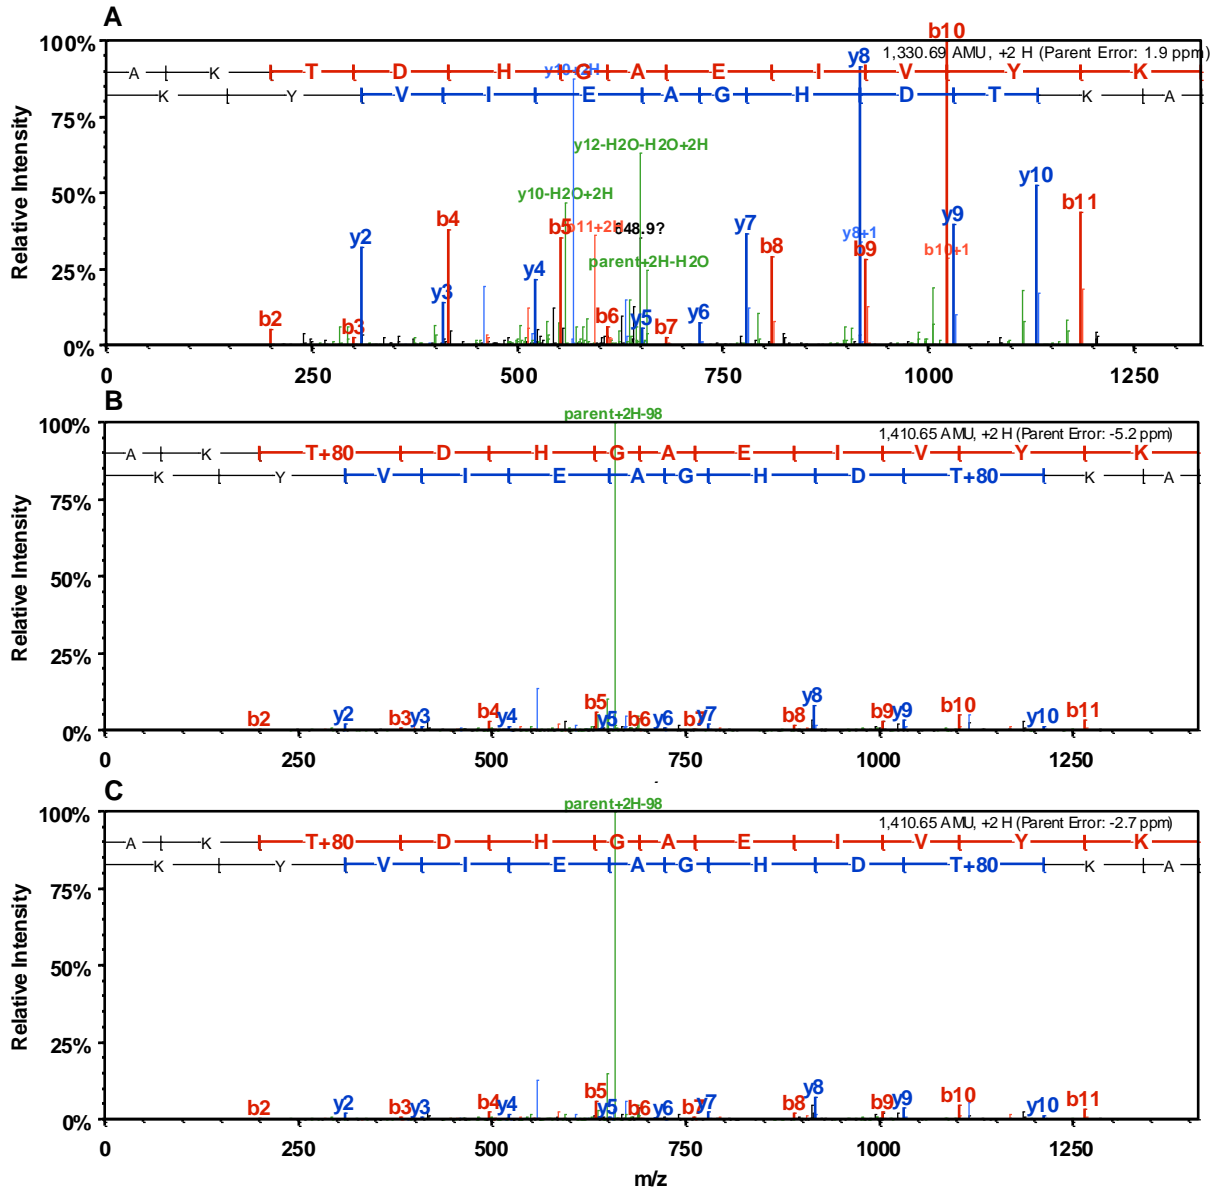

Figure S12. MS/MS spectra of (A) control, (B) Chk1-treated and (C) Chk2-treated samples showing that Thr386 was phosphorylated by Chk1 and Chk2. The corresponding nonphosphopeptide detected in the control is also shown.
